# Supplementary material
Source: PubMed Central journal article supplement (PMC3053323)
Supplement: pgen.1001329.s009.pdf [file pgen.1001329.s009.pdf]

**Table S3. Strain list**

| <b>Strain</b>         | <b>Genotype</b>                                                                                                                                                                                                                                                                                                                                                                         |
|-----------------------|-----------------------------------------------------------------------------------------------------------------------------------------------------------------------------------------------------------------------------------------------------------------------------------------------------------------------------------------------------------------------------------------|
| AY4221 <sup>(1)</sup> | <i>h<sup>+</sup> leu1-32 lys1<sup>+</sup>::mat-M</i>                                                                                                                                                                                                                                                                                                                                    |
| HM4501                | <i>h<sup>-</sup> ura4-D18 lys1<sup>+</sup>::mat-Pc<sup>(2)</sup> pat1-114<sup>(3)</sup> cen2(D107)::kar<sup>f</sup>-ura4<sup>+</sup>-lacO<sup>(4)</sup><br/>his7<sup>+</sup>::Pdis1-NLS-GFP-lacI<sup>(5)</sup></i>                                                                                                                                                                      |
| L972                  | <i>h<sup>-</sup></i>                                                                                                                                                                                                                                                                                                                                                                    |
| PZ249 <sup>(6)</sup>  | <i>h<sup>+</sup> leu1-32 moa1::kar<sup>f(7)</sup> lys1<sup>+</sup>::lacO his7<sup>+</sup>::Pdis1-NLS-GFP-lacI</i>                                                                                                                                                                                                                                                                       |
| SHMF373-8C            | <i>h<sup>+</sup>/h<sup>+</sup> ade6/ade6<sup>+</sup> leu1-32/leu1-32 lys1-131/lys1-131 ura4-D18/ura4-D18<br/>rec8::ura4<sup>+</sup>/rec8<sup>+</sup> sid4<sup>+</sup>::GFP-kar<sup>f</sup>/sid4<sup>+</sup>::GFP-kar<sup>f(8)</sup><br/>cen2(D107)::kar<sup>f</sup>-ura4<sup>+</sup>-lacO/cen2(D107) his7<sup>+</sup>::Pdis1-NLS-GFP-lacI/<br/>his7<sup>+</sup>::Pdis1-NLS-GFP-lacI</i> |
| SHM33-4C              | <i>h<sup>+</sup> leu1-32 ura4-D18 rec14-161::LEU2<sup>(9)</sup> cen2(D107)::kar<sup>f</sup>-ura4<sup>+</sup>-lacO<br/>his7<sup>+</sup>::Pdis1-NLS-GFP-lacI</i>                                                                                                                                                                                                                          |
| SHN65-6B              | <i>h<sup>-</sup> ade6-M216 leu1-32 lys1-131 sad1<sup>+</sup>::DsRed-LEU2<sup>(10)</sup><br/>cnp1::NAT<sup>f</sup>-Pcnp1-GFP-cnp1<sup>+</sup><sup>(11)</sup></i>                                                                                                                                                                                                                         |
| SHN65-10C             | <i>h<sup>+</sup> ade6-M216 his2 leu1-32 lys1-131 sad1<sup>+</sup>::DsRed-LEU2<br/>cnp1::NAT<sup>f</sup>-Pcnp1-GFP-cnp1<sup>+</sup></i>                                                                                                                                                                                                                                                  |
| SRS3-2D               | <i>h<sup>-</sup> leu1-32 ura4-D18 rec14-161::LEU2 sgo1::kar<sup>f(12)</sup> cen2(D107)::kar<sup>f</sup>-ura4<sup>+</sup>-lacO<br/>his7<sup>+</sup>::Pdis1-NLS-GFP-lacI</i>                                                                                                                                                                                                              |
| SRS3-6A               | <i>h<sup>-</sup> leu1-32 ura4-D18 rec14-161::LEU2 cen2(D107)::kar<sup>f</sup>-ura4<sup>+</sup>-lacO<br/>his7<sup>+</sup>::Pdis1-NLS-GFP-lacI</i>                                                                                                                                                                                                                                        |
| SRS3-8A               | <i>h<sup>+</sup> leu1-32 ura4-D18 rec14-161::LEU2 his7<sup>+</sup>::Pdis1-NLS-GFP-lacI</i>                                                                                                                                                                                                                                                                                              |
| SRS3-9B               | <i>h<sup>+</sup> leu1-32 ura4-D18 rec14-161::LEU2 sgo1::kar<sup>f</sup> his7<sup>+</sup>::Pdis1-NLS-GFP-lacI</i>                                                                                                                                                                                                                                                                        |
| SRS5-4C               | <i>h<sup>90</sup> ade6 leu1-32 ura4-D18 rec12-152::LEU2<sup>(13)</sup> sgo1::kar<sup>f</sup> mad2::ura4<sup>+</sup><sup>(14)</sup><br/>lys1<sup>+</sup>::Pnda3-GFP-atb2<sup>+</sup><sup>(15)</sup></i>                                                                                                                                                                                  |
| STO12-2B              | <i>h<sup>-</sup> leu1-32 ura4-D18 mrc1::kar<sup>f(16)</sup></i>                                                                                                                                                                                                                                                                                                                         |
| STO55-1B              | <i>h<sup>+</sup> ade6-M210 leu1-32 lys1-131 ura4-D18 rec12-152::LEU2 mrc1::kar<sup>f</sup><br/>cen2(D107)::kar<sup>f</sup>-ura4<sup>+</sup>-lacO his7<sup>+</sup>::Pdis1-NLS-GFP-lacI</i>                                                                                                                                                                                               |
| STO55-2A              | <i>h<sup>-</sup> leu1-32 lys1-131 ura4-D18 rec12-152::LEU2 mrc1::kar<sup>f</sup></i>                                                                                                                                                                                                                                                                                                    |
| STO55-5B              | <i>h<sup>-</sup> leu1-32 ura4-D18 rec12-152::LEU2 mrc1::kar<sup>f</sup></i>                                                                                                                                                                                                                                                                                                             |
| STO72-4C              | <i>h<sup>+</sup> leu1-32 ura4-D18 rec12-152::LEU2 mrc1::kar<sup>f</sup> sid4<sup>+</sup>::GFP-kar<sup>f</sup><br/>his7<sup>+</sup>::Pdis1-NLS-GFP-lacI</i>                                                                                                                                                                                                                              |
| STO76-14D             | <i>h<sup>-</sup> leu1-32 ura4-D18 rec12-152::LEU2 moa1::kar<sup>f</sup> sid4<sup>+</sup>::GFP-kar<sup>f</sup><br/>cen2(D107)::kar<sup>f</sup>-ura4<sup>+</sup>-lacO his7<sup>+</sup>::Pdis1-NLS-GFP-lacI</i>                                                                                                                                                                            |
| STO78-8D              | <i>h<sup>-</sup> leu1-32 ura4-D18 mrc1::kar<sup>f</sup> sid4<sup>+</sup>::GFP-kar<sup>f</sup> cen2(D107)::kar<sup>f</sup>-ura4<sup>+</sup>-lacO<br/>his7<sup>+</sup>::Pdis1-NLS-GFP-lacI</i>                                                                                                                                                                                            |
| STO79-1D              | <i>h<sup>+</sup> ade6 leu1-32 lys1-131 ura4-D18 mrc1::kar<sup>f</sup> sid4<sup>+</sup>::GFP-kar<sup>f</sup><br/>cen2(D107)::kar<sup>f</sup>-ura4<sup>+</sup>-lacO his7<sup>+</sup>::Pdis1-NLS-GFP-lacI</i>                                                                                                                                                                              |
| STO79-2A              | <i>h<sup>-</sup> ade6 leu1-32 ura4-D18 rec12-152::LEU2 mrc1::kar<sup>f</sup> sid4<sup>+</sup>::GFP-kar<sup>f</sup><br/>cen2(D107)::kar<sup>f</sup>-ura4<sup>+</sup>-lacO his7<sup>+</sup>::Pdis1-NLS-GFP-lacI</i>                                                                                                                                                                       |

|           |                                                                                                                                                                                                                               |
|-----------|-------------------------------------------------------------------------------------------------------------------------------------------------------------------------------------------------------------------------------|
| STO85-6A  | <i>h<sup>+</sup> leu1-32 ura4-D18 rec12-152::LEU2 mrc1::kar<sup>f</sup> lys1<sup>+</sup>::Pnda3-GFP-atb2<sup>+</sup></i>                                                                                                      |
| STO85-8B  | <i>h<sup>-</sup> leu1-32 ura4-D18 rec12-152::LEU2 mrc1::kar<sup>f</sup> mad2::ura4<sup>+</sup> lys1<sup>+</sup>::Pnda3-GFP-atb2<sup>+</sup></i>                                                                               |
| STO86-1D  | <i>h<sup>-</sup> leu1-32 lys1-131 ura4-D18 mrc1::kar<sup>f</sup> his7<sup>+</sup>::Pdis1-NLS-GFP-lacI</i>                                                                                                                     |
| STO86-6C  | <i>h<sup>+</sup> leu1-32 lys1-131 ura4-D18 mrc1::kar<sup>f</sup> cen2(D107)::kar<sup>f</sup>-ura4<sup>+</sup>-lacO his7<sup>+</sup>::Pdis1-NLS-GFP-lacI</i>                                                                   |
| STO86-12A | <i>h<sup>-</sup> leu1-32 lys1-131 ura4-D18 mrc1::kar<sup>f</sup> cen2(D107)::kar<sup>f</sup>-ura4<sup>+</sup>-lacO his7<sup>+</sup>::Pdis1-NLS-GFP-lacI</i>                                                                   |
| STO92-1D  | <i>h<sup>+</sup> leu1-32 lys1-131 ura4-D18 rec12-152::LEU2 mrc1::kar<sup>f</sup> mad2::ura4<sup>+</sup></i>                                                                                                                   |
| STO94-8B  | <i>h<sup>+</sup> leu1-32 lys1-131 ura4-D18 rec12-152::LEU2 mad2::ura4<sup>+</sup> mrc1::kar<sup>f</sup> cen2(D107)::kar<sup>f</sup>-ura4<sup>+</sup>-lacO his7<sup>+</sup>::Pdis1-NLS-GFP-lacI</i>                            |
| STO94-14D | <i>h<sup>-</sup> leu1-32 lys1-131 ura4-D18 rec12-152::LEU2 mad2::ura4<sup>+</sup> mrc1::kar<sup>f</sup> his7<sup>+</sup>::Pdis1-NLS-GFP-lacI</i>                                                                              |
| STOT10    | <i>h<sup>-</sup> ura4-D18 mrc1::kar<sup>f</sup> lys1<sup>+</sup>::mat-Pc pat1-114 cen2(D107)::kar<sup>f</sup>-ura4<sup>+</sup>-lacO his7<sup>+</sup>::Pdis1-NLS-GFP-lacI</i>                                                  |
| STOT64    | <i>h<sup>+</sup> ade6-M216 leu1-32 ura4-D18 rec12-152::LEU2 mad2::ura4<sup>+</sup> moa1::kar<sup>f(13)</sup> aur1<sup>+</sup>::aur1<sup>f</sup>-Pnda3-GFP-atb2<sup>+(17)</sup></i>                                            |
| STOT65    | <i>h<sup>-</sup> ade6-M210 leu1-32 ura4-D18 rec12-152::LEU2 mad2::ura4<sup>+</sup> moa1::kar<sup>f</sup> aur1<sup>+</sup>::aur1<sup>f</sup>-Pnda3-GFP-atb2<sup>+</sup></i>                                                    |
| STOT66    | <i>h<sup>-</sup> ade6-M216 leu1-32 ura4-D18 rec12-152::LEU2 moa1::kar<sup>f</sup> aur1<sup>+</sup>::aur1<sup>f</sup>-Pnda3-GFP-atb2<sup>+</sup></i>                                                                           |
| STOT67    | <i>h<sup>+</sup> ade6-M210 leu1-32 ura4-D18 rec12-152::LEU2 moa1::kar<sup>f</sup> aur1<sup>+</sup>::aur1<sup>f</sup>-Pnda3-GFP-atb2<sup>+</sup></i>                                                                           |
| SVV32-9B  | <i>h<sup>+</sup> his2 mrc1::kar<sup>f</sup></i>                                                                                                                                                                               |
| SY4-25    | <i>h<sup>+</sup> his2 ura4-D18</i>                                                                                                                                                                                            |
| SY4-27    | <i>h<sup>-</sup> leu1-32 ura4-D18</i>                                                                                                                                                                                         |
| SY6-59    | <i>h<sup>+</sup> ade6-M210 leu1-32 ura4-D18 lys1<sup>+</sup>::lacO his7<sup>+</sup>::Pdis1-NLS-GFP-lacI</i>                                                                                                                   |
| SY15-26   | <i>h<sup>+</sup> leu1-32 lys1-131 rec12-152::LEU2 cen2(D107)::kar<sup>f</sup>-ura4<sup>+</sup>-lacO his7<sup>+</sup>::Pdis1-NLS-GFP-lacI</i>                                                                                  |
| SY16-31   | <i>h<sup>-</sup> leu1-32 lys1-131 ura4-D18 his7<sup>+</sup>::Pdis1-NLS-GFP-lacI</i>                                                                                                                                           |
| SY16-43   | <i>h<sup>-</sup> leu1-32 lys1-131 ura4-D18 rec12-152::LEU2 his7<sup>+</sup>::Pdis1-NLS-GFP-lacI</i>                                                                                                                           |
| SY20-03   | <i>h<sup>90</sup> ade6-M216 leu1-32 lys1-131 ura4-D18 sid4<sup>+</sup>::GFP-kar<sup>f</sup> cen2(D107)::kar<sup>f</sup>-ura4<sup>+</sup>-lacO his7<sup>+</sup>::Pdis1-NLS-GFP-lacI</i>                                        |
| SY20-04   | <i>h<sup>90</sup> ade6 leu1-32 ura4-D18 rec12-152::LEU2 sid4<sup>+</sup>::GFP-kar<sup>f</sup> cen2(D107)::kar<sup>f</sup>-ura4<sup>+</sup>-lacO his7<sup>+</sup>::Pdis1-NLS-GFP-lacI</i>                                      |
| SY20-26   | <i>h<sup>90</sup> ade6-M210 leu1-32 lys1-131 ura4-D18 rec12-152::LEU2 mad2::ura4<sup>+</sup> sid4<sup>+</sup>::GFP-kar<sup>f</sup> cen2(D107)::kar<sup>f</sup>-ura4<sup>+</sup>-lacO his7<sup>+</sup>::Pdis1-NLS-GFP-lacI</i> |
| SY21-08   | <i>h<sup>90</sup> ade6-M210 leu1-32 lys1-131 ura4-D18 mad2::ura4<sup>+</sup> sid4<sup>+</sup>::GFP-kar<sup>f</sup> cen2(D107)::kar<sup>f</sup>-ura4<sup>+</sup>-lacO his7<sup>+</sup>::Pdis1-NLS-GFP-lacI</i>                 |
| SY22-40   | <i>h<sup>90</sup> ade6-M210 leu1-32 ura4-D18 rec8::ura4<sup>+(18)</sup> lys1<sup>+</sup>::Pnda3-GFP-atb2<sup>+</sup></i>                                                                                                      |

|             |                                                                                                                                                                                                         |
|-------------|---------------------------------------------------------------------------------------------------------------------------------------------------------------------------------------------------------|
| SY22-57     | <i>h<sup>-</sup> ade6-M210 leu1-32 lys1-131 ura4-D18 rec8::ura4<sup>+</sup> sid4<sup>+</sup>::GFP-kar<sup>f</sup> his7<sup>+</sup>::Pdis1-NLS-GFP-lacI</i>                                              |
| SY22-69     | <i>h<sup>90</sup> ade6-M210 leu1-32 ura4-D18 rec8::ura4<sup>+</sup> mad2::ura4<sup>+</sup> lys1<sup>+</sup>::Pnda3-GFP-atb2<sup>+</sup></i>                                                             |
| SY23-02     | <i>h<sup>+</sup> ade6 leu1-32 lys1-131 ura4-D18 rec8::ura4<sup>+</sup> sid4<sup>+</sup>::GFP-kar<sup>f</sup> cen2(D107)::kar<sup>f</sup>-ura4<sup>+</sup>-lacO his7<sup>+</sup>::Pdis1-NLS-GFP-lacI</i> |
| SY29-81     | <i>h<sup>90</sup> ade6-M210 leu1-32 ura4-D18 sgo1::kar<sup>f</sup> lys1<sup>+</sup>::Pnda3-GFP-atb2<sup>+</sup></i>                                                                                     |
| SY30-06     | <i>h<sup>90</sup> ade6-M210 leu1-32 ura4-D18 rec12-152::LEU2 sgo1::kar<sup>f</sup> lys1<sup>+</sup>::Pnda3-GFP-atb2<sup>+</sup></i>                                                                     |
| SYH18-2-1C  | <i>h<sup>+</sup> leu1-32 lys1-131 ura4-D18 rec12-152::LEU2 sgo1::kar<sup>f</sup> cen2(D107)::kar<sup>f</sup>-ura4<sup>+</sup>-lacO his7<sup>+</sup>::Pdis1-NLS-GFP-lacI</i>                             |
| SYH18-2-6A  | <i>h<sup>-</sup> leu1-32 ura4-D18 sgo1::kar<sup>f</sup> his7<sup>+</sup>::Pdis1-NLS-GFP-lacI</i>                                                                                                        |
| SYH18-2-6D  | <i>h<sup>-</sup> leu1-32 ura4-D18 rec12-152::LEU2 sgo1::kar<sup>f</sup> his7<sup>+</sup>::Pdis1-NLS-GFP-lacI</i>                                                                                        |
| SYH18-2-8B  | <i>h<sup>+</sup> leu1-32 lys1-131 ura4-D18 sgo1::kar<sup>f</sup> cen2(D107)::kar<sup>f</sup>-ura4<sup>+</sup>-lacO his7<sup>+</sup>::Pdis1-NLS-GFP-lacI</i>                                             |
| SYH19-2-9A  | <i>h<sup>-</sup> leu1-32 lys1-131 ura4-D18 cen2(D107)::kar<sup>f</sup>-ura4<sup>+</sup>-lacO his7<sup>+</sup>::Pdis1-NLS-GFP-lacI</i>                                                                   |
| SYH19-3A    | <i>h<sup>-</sup> leu1-32 lys1-131 ura4-D18 rec12-152::LEU2 cen2(D107)::kar<sup>f</sup>-ura4<sup>+</sup>-lacO his7<sup>+</sup>::Pdis1-NLS-GFP-lacI</i>                                                   |
| SYH19-3B    | <i>h<sup>+</sup> leu1-32 lys1-131 ura4-D18 rec12-152::LEU2 cen2(D107)::kar<sup>f</sup>-ura4<sup>+</sup>-lacO his7<sup>+</sup>::Pdis1-NLS-GFP-lacI</i>                                                   |
| SYH19-4C    | <i>h<sup>+</sup> leu1-32 lys1-131 ura4-D18 cen2(D107)::kar<sup>f</sup>-ura4<sup>+</sup>-lacO his7<sup>+</sup>::Pdis1-NLS-GFP-lacI</i>                                                                   |
| SYH19-6A    | <i>h<sup>-</sup> leu1-32 lys1-131 ura4-D18 his7<sup>+</sup>::Pdis1-NLS-GFP-lacI</i>                                                                                                                     |
| SYH44-1-16A | <i>h<sup>+</sup> leu1-32 lys1-131 ura4-D18 rec12-152::LEU2 mad2::ura4<sup>+</sup> cen2(D107)::kar<sup>f</sup>-ura4<sup>+</sup>-lacO his7<sup>+</sup>::Pdis1-NLS-GFP-lacI</i>                            |
| SYH44-1-6B  | <i>h<sup>-</sup> leu1-32 lys1-131 ura4-D18 rec12-152::LEU2 mad2::ura4<sup>+</sup> his7<sup>+</sup>::Pdis1-NLS-GFP-lacI</i>                                                                              |
| SYH86-4A    | <i>h<sup>-</sup> leu1-32 moa1::kar<sup>f</sup> sgo1::kar<sup>f</sup> lys1<sup>+</sup>::lacO his7<sup>+</sup>::Pdis1-NLS-GFP-lacI</i>                                                                    |
| SYH86-4B    | <i>h<sup>-</sup> leu1-32 ura4-D18 rec12-152::LEU2 moa1::kar<sup>f</sup> lys1<sup>+</sup>::lacO his7<sup>+</sup>::Pdis1-NLS-GFP-lacI</i>                                                                 |
| SYH87-4B    | <i>h<sup>+</sup> leu1-32 ura4-D18 rec12-152::LEU2 moa1::kar<sup>f</sup> his7<sup>+</sup>::Pdis1-NLS-GFP-lacI</i>                                                                                        |
| SYH89-2B    | <i>h<sup>-</sup> leu1-32 ura4-D18 rec12-152::LEU2 mad2::ura4<sup>+</sup> moa1::kar<sup>f</sup> cen2(D107)::kar<sup>f</sup>-ura4<sup>+</sup>-lacO his7<sup>+</sup>::Pdis1-NLS-GFP-lacI</i>               |
| SYH89-5A    | <i>h<sup>+</sup> leu1-32 ura4-D18 rec12-152::LEU2 mad2::ura4<sup>+</sup> moa1::kar<sup>f</sup> his7<sup>+</sup>::Pdis1-NLS-GFP-lacI</i>                                                                 |
| SYH89-16C   | <i>h<sup>-</sup> leu1-32 ura4-D18 rec12-152::LEU2 moa1::kar<sup>f</sup> cen2(D107)::kar<sup>f</sup>-ura4<sup>+</sup>-lacO his7<sup>+</sup>::Pdis1-NLS-GFP-lacI</i>                                      |
| SYH89-17D   | <i>h<sup>-</sup> leu1-32 ura4-D18 moa1::kar<sup>f</sup> cen2(D107)::kar<sup>f</sup>-ura4<sup>+</sup>-lacO his7<sup>+</sup>::Pdis1-NLS-GFP-lacI</i>                                                      |

|             |                                                                                                                                                                                                              |
|-------------|--------------------------------------------------------------------------------------------------------------------------------------------------------------------------------------------------------------|
| SYH91-1C    | <i>h<sup>-</sup> leu1-32 lys1-131 ura4-D18 rec12-152::LEU2 sgo1::kar<sup>f</sup> his7<sup>+</sup>::Pdis1-NLS-GFP-lacI</i>                                                                                    |
| SYH91-2-11B | <i>h<sup>+</sup> leu1-32 ura4-D18 sgo1::kar<sup>f</sup> lys1<sup>+</sup>::lacO his7<sup>+</sup>::Pdis1-NLS-GFP-lacI</i>                                                                                      |
| SYH91-13D   | <i>h<sup>+</sup> leu1-32 ura4-D18 sgo1::kar<sup>f</sup> his7<sup>+</sup>::Pdis1-NLS-GFP-lacI</i>                                                                                                             |
| SYH91-14B   | <i>h<sup>-</sup> leu1-32 lys1-131 ura4-D18 sgo1::kar<sup>f</sup> his7<sup>+</sup>::Pdis1-NLS-GFP-lacI</i>                                                                                                    |
| SYH91-15B   | <i>h<sup>+</sup> leu1-32 ura4-D18 rec12-152::LEU2 sgo1::kar<sup>f</sup> lys1<sup>+</sup>::lacO his7<sup>+</sup>::Pdis1-NLS-GFP-lacI</i>                                                                      |
| SYH96-2C    | <i>h<sup>+</sup> leu1-32 ura4-D18 moa1::kar<sup>f</sup> his7<sup>+</sup>::Pdis1-NLS-GFP-lacI</i>                                                                                                             |
| SYH96-1D    | <i>h<sup>-</sup> leu1-32 ura4-D18 moa1::kar<sup>f</sup> his7<sup>+</sup>::Pdis1-NLS-GFP-lacI</i>                                                                                                             |
| SYH129-3B   | <i>h<sup>+</sup> leu1-32 ura4-D18 rec12-152::LEU2 lys1<sup>+</sup>::lacO his7<sup>+</sup>::Pdis1-NLS-GFP-lacI</i>                                                                                            |
| SYH129-6D   | <i>h<sup>-</sup> leu1-32 ura4-D18 rec12-152::LEU2 mad2::ura4<sup>+</sup> his7<sup>+</sup>::Pdis1-NLS-GFP-lacI</i>                                                                                            |
| SYH129-3D   | <i>h<sup>+</sup> leu1-32 ura4-D18 rec12-152::LEU2 mad2::ura4<sup>+</sup> lys1<sup>+</sup>::lacO his7<sup>+</sup>::Pdis1-NLS-GFP-lacI</i>                                                                     |
| SYH129-16D  | <i>h<sup>-</sup> leu1-32 ura4-D18 rec12-152::LEU2 his7<sup>+</sup>::Pdis1-NLS-GFP-lacI</i>                                                                                                                   |
| SYH132-3B   | <i>h<sup>+</sup> leu1-32 ura4-D18 rec12-152::LEU2 moa1::kar<sup>f</sup> sid4<sup>+</sup>::GFP-kar<sup>f</sup> cen2(D107)::kar<sup>f</sup>-ura4<sup>+</sup>-lacO his7<sup>+</sup>::Pdis1-NLS-GFP-lacI</i>     |
| SYH132-4C   | <i>h<sup>+</sup> leu1-32 ura4-D18 moa1::kar<sup>f</sup> sid4<sup>+</sup>::GFP-kar<sup>f</sup> cen2(D107)::kar<sup>f</sup>-ura4<sup>+</sup>-lacO his7<sup>+</sup>::Pdis1-NLS-GFP-lacI</i>                     |
| SYH132-8A   | <i>h<sup>-</sup> leu1-32 ura4-D18 moa1::kar<sup>f</sup> sid4<sup>+</sup>::GFP-kar<sup>f</sup> cen2(D107)::kar<sup>f</sup>-ura4<sup>+</sup>-lacO his7<sup>+</sup>::Pdis1-NLS-GFP-lacI</i>                     |
| SYH145-6D   | <i>h<sup>+</sup> ura4-D18 moa1::kar<sup>f</sup> sgo1::kar<sup>f</sup> his7<sup>+</sup>::Pdis1-NLS-GFP-lacI</i>                                                                                               |
| SYH193-2A   | <i>h<sup>-</sup> ura4-D18 sgo1::kar<sup>f</sup> lys1<sup>+</sup>::mat-Pc pat1-114 cen2(D107)::kar<sup>f</sup>-ura4<sup>+</sup>-lacO his7<sup>+</sup>::Pdis1-NLS-GFP-lacI</i>                                 |
| SYH193-11B  | <i>h<sup>-</sup> ura4-D18 sgo1::kar<sup>f</sup> pat1-114 cen2(D107)::kar<sup>f</sup>-ura4<sup>+</sup>-lacO his7<sup>+</sup>::Pdis1-NLS-GFP-lacI</i>                                                          |
| SYH215-2A   | <i>h<sup>-</sup> leu1-32 ura4-D18 rec12-152::LEU2 mad2::ura4<sup>+</sup> sgo1::kar<sup>f</sup> lys1<sup>+</sup>::lacO his7<sup>+</sup>::Pdis1-NLS-GFP-lacI</i>                                               |
| SYH215-6A   | <i>h<sup>+</sup> leu1-32 lys1-131 ura4-D18 rec12-152::LEU2 mad2::ura4<sup>+</sup> sgo1::kar<sup>f</sup> his7<sup>+</sup>::Pdis1-NLS-GFP-lacI</i>                                                             |
| SYH226-6B   | <i>h<sup>-</sup> leu1-32 lys1-131 ura4-D18 rec12-152::LEU2 mad2::ura4<sup>+</sup> sgo1::kar<sup>f</sup> cen2(D107)::kar<sup>f</sup>-ura4<sup>+</sup>-lacO his7<sup>+</sup>::Pdis1-NLS-GFP-lacI</i>           |
| SYIT7       | <i>h<sup>-</sup> ura4-D18 mad2::ura4<sup>+</sup> sgo1::kar<sup>f</sup> lys1<sup>+</sup>::mat-Pc pat1-114 cen2(D107)::kar<sup>f</sup>-ura4<sup>+</sup>-lacO his7<sup>+</sup>::Pdis1-NLS-GFP-lacI</i>          |
| SYIT9       | <i>h<sup>-</sup> ura4-D18 moa1::kar<sup>f</sup> aur1<sup>+</sup>::aur1<sup>f</sup>-mat-Pc<sup>(19)</sup> pat1-114 cen2(D107)::kar<sup>f</sup>-ura4<sup>+</sup>-lacO his7<sup>+</sup>::Pdis1-NLS-GFP-lacI</i> |

Source: (1) [33]; (2) [33]; (3) [31]; (4) [33]; (5) [67]; (6) gift from Y. Watanabe; (7) [34]; (8) [68]; (9) [38]; (10) [69]; (11) [70]; (12) [19]; (13) [71]; (14) [72]; (15) [73]; (16) [45]; (17) this study; (18) [74]; (19) this study.
